# Supplementary material
Source: ML conference proceedings conference paper supplement (https://openreview.net/forum?id=ZMliWjMCor)

clients from mode 1

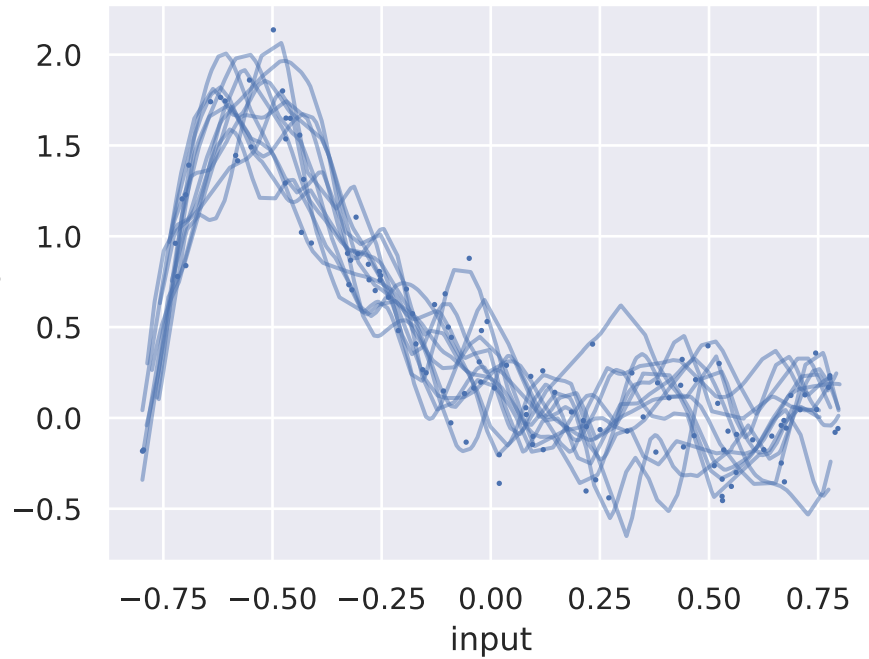

clients from mode 2

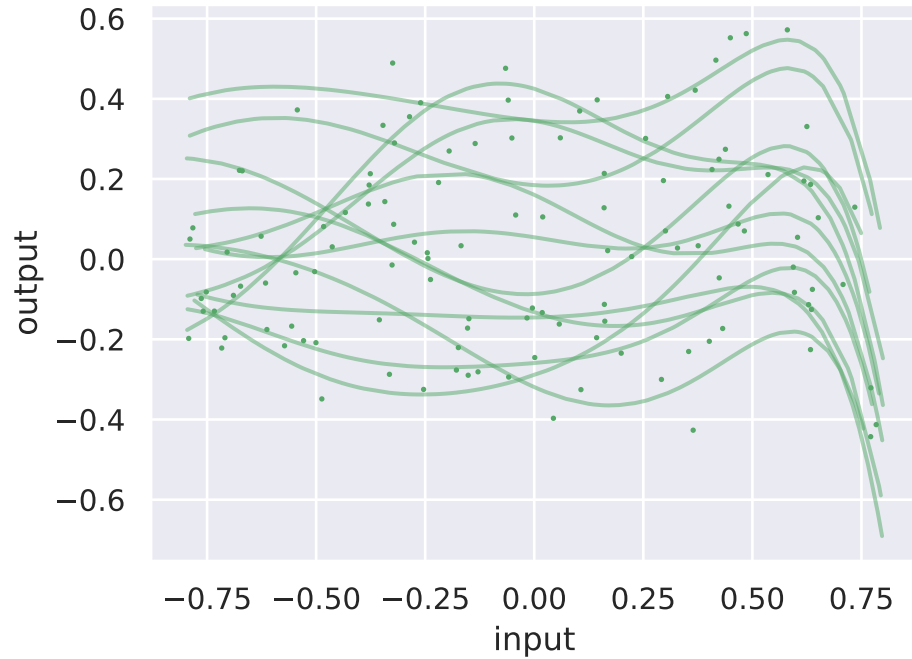

Supplement: supplementary_material [file attachment]

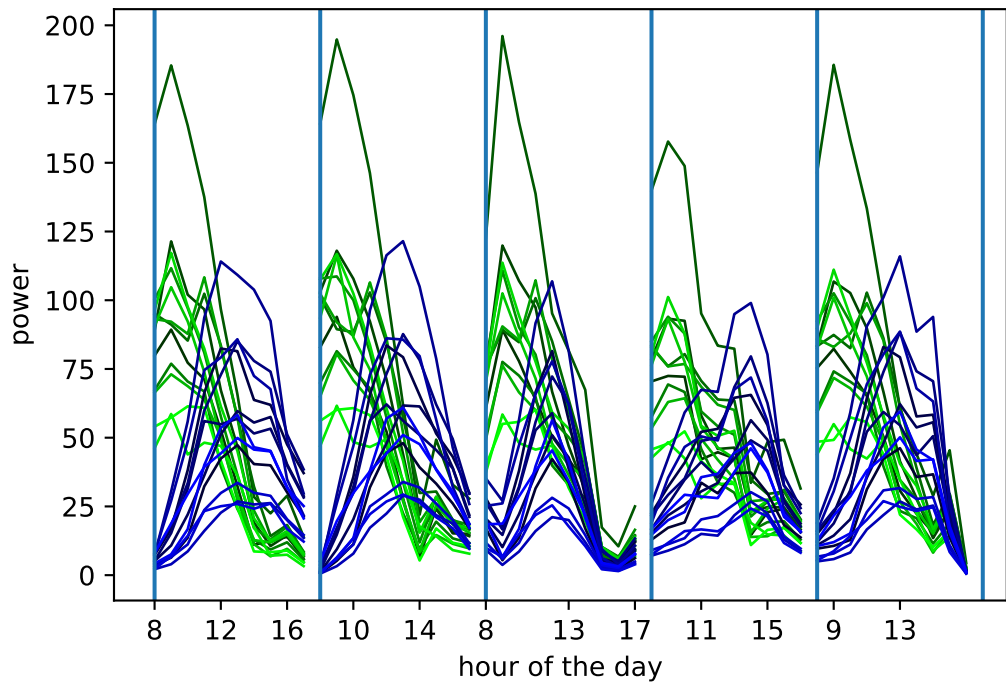

Supplement: supplementary_material [file attachment]
